# Supplementary material for: Ecotoxicological Assessment of Thermally- and Hydrogen-Reduced Graphene Oxide/TiO2 Photocatalytic Nanocomposites Using the Zebrafish Embryo Model
Source: PubMed Central journal article supplement (PMC6523634; doi:10.3390/nano9040488), 2019-03-28
Supplement: nanomaterials-09-00488-s001.pdf [file nanomaterials-09-00488-s001.pdf]

**Table S1.** Acute Toxicity Rating Scale by Fish and Wildlife Service (FWS) [1].

| Relative Toxicity    | Aquatic LC <sub>50</sub> (mg/L) |
|----------------------|---------------------------------|
| Super Toxic          | 0.01–0.1                        |
| Highly Toxic         | 0.1–1                           |
| Moderately Toxic     | 1–10                            |
| Slightly Toxic       | 10–100                          |
| Practically Nontoxic | 100–1000                        |
| Relatively Harmless  | >1000                           |

### General Teratogenic Effect Assessment by Gross microscopic examination

Embryos treated with 100 and 200 mg/L of RGOTi did not show any teratogenic effects. At 400 mg/L and above all of the embryos had pericardial edema and movement difficulties. The scoliosis teratogenic effect started at 400 mg/L (80% of the embryo) and increased in dose dependent manner. The yolk edema teratogenic effect was evident at 600 mg/L and increased at doses dependent manner, suggesting specific effect of the RGOTi. Embryos exposure at 100 and 200 mg/L of H<sub>2</sub>RGOTi also failed to induce teratogenic effects. H<sub>2</sub>RGOTi-elicited teratogenic effect was less severe than RGOTi, as scoliosis and body deformities (other than heart edema) was absent at dose 400 and 600 mg/L. The yolk edema teratogenic effect was started at 800 mg/L for both compounds. These results suggests that up 200 mg/mL, these nanocomposite has no adverse effect on embryonic development of zebrafish embryos.

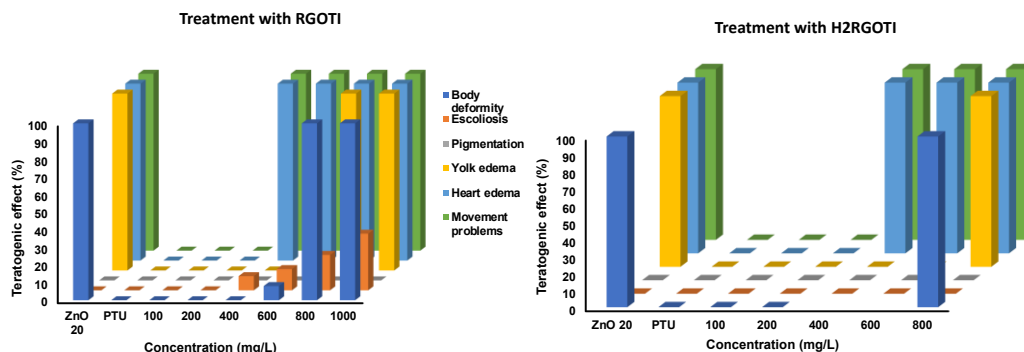

**Figure S1.** Graphical representation of the teratogenic effects observed in the embryos treated with RGOTi and H<sub>2</sub>RGOTi.

### References

- 1 El-Harbawi, M. Toxicity Measurement of Imidazolium Ionic Liquids Using Acute Toxicity Test. *Procedia Chem.* **2014**, *9*, 40–52.
